# Supplementary material
Source: MDPI journal article supplement (https://www.mdpi.com/2073-4441/12/10/2857)
Supplement: s1 [file s1]

Raccoon River Nitrates Issue QuASSR

The Raccoon River Nitrates Issue (below) was employed in this study as the Quantitative Assessment of Socio-Scientific Reasoning (SSR) as a measure of undergraduates’ sophistication of SSR.

In Iowa, Buena Vista, Sac, and Calhoun Counties comprise a region known as ‘Big Corn.’ Thanks to fertile soil, the loading of fertilizers, and the installation of subsurface drainage tiles in the fields to facilitate the timely planting of crops in wet springtime conditions, the Big Corn region pumps out corn for feed and ethanol. This agricultural industry serves as an economic boon for the region and state, including the individuals residing in the surrounding rural areas (Who will pay, 2016).

Downstream from Big Corn is Des Moines, the most populous city in Iowa. Des Moines’ water supply is drawn from the Raccoon River - the same river that drains the watershed that includes the fields of Big Corn (Figure 1). Scientists at the Des Moines Water Works, the regional utility responsible for making the water safe to drink, indicated that water sampled from a variety of sites around Big Corn that drain into the Raccoon River showed nitrate levels four times higher than the federal limits for safe drinking water (10mg/L; Neeley, 2017) – an unfortunate reality of fertilizer loading that is exacerbated by the use of tile drainage systems (Sands et al., 2012). Nitrate is a dangerous compound in drinking water, as it stops oxygen from entering the human bloodstream. The cost for Des Moines Water Works to filter nitrates from the water for their .5 million customers is about $7,000 a day. Des Moines Water Works argues that the polluted water resulting from fertilizer runoff should be regulated by the federal government as part of the Clean Water Act. They have filed a lawsuit against the Farmers’ Drainage Cooperative that governs drainage of the fields in Big Corn, which would require them to pay for the costly removal of nitrates from the water of the Raccoon River. A judgement for the Des Moines Water Works would have far-reaching ramifications, as it would overturn a historic precedent that has protected farmers for over a century from being answerable for the agricultural runoff responsible for polluting Iowa’s waterways. The lawsuit has already cost ratepayers in Des Moines $1,000,000.

A third party, the Iowa Partnership for Clean Water indicates that its purpose is to work “to inform all stakeholders – both rural and urban – about the consequences of frivolous legal action against farmers and the agriculture industry” (Iowa Partnership, 2016). This group argues that clean water is a priority, but they promote the voluntary use of technologies to do so, rather than legal actions. Concerning the Raccoon River situation, the Iowa Partnership for Clean Water suggests that the Farmers’ Drainage Cooperative of Big Corn should employ precision agriculture practices to reduce fertilizer runoff and that Des Moines Water Works should upgrade the technology used in its treatment facilities.


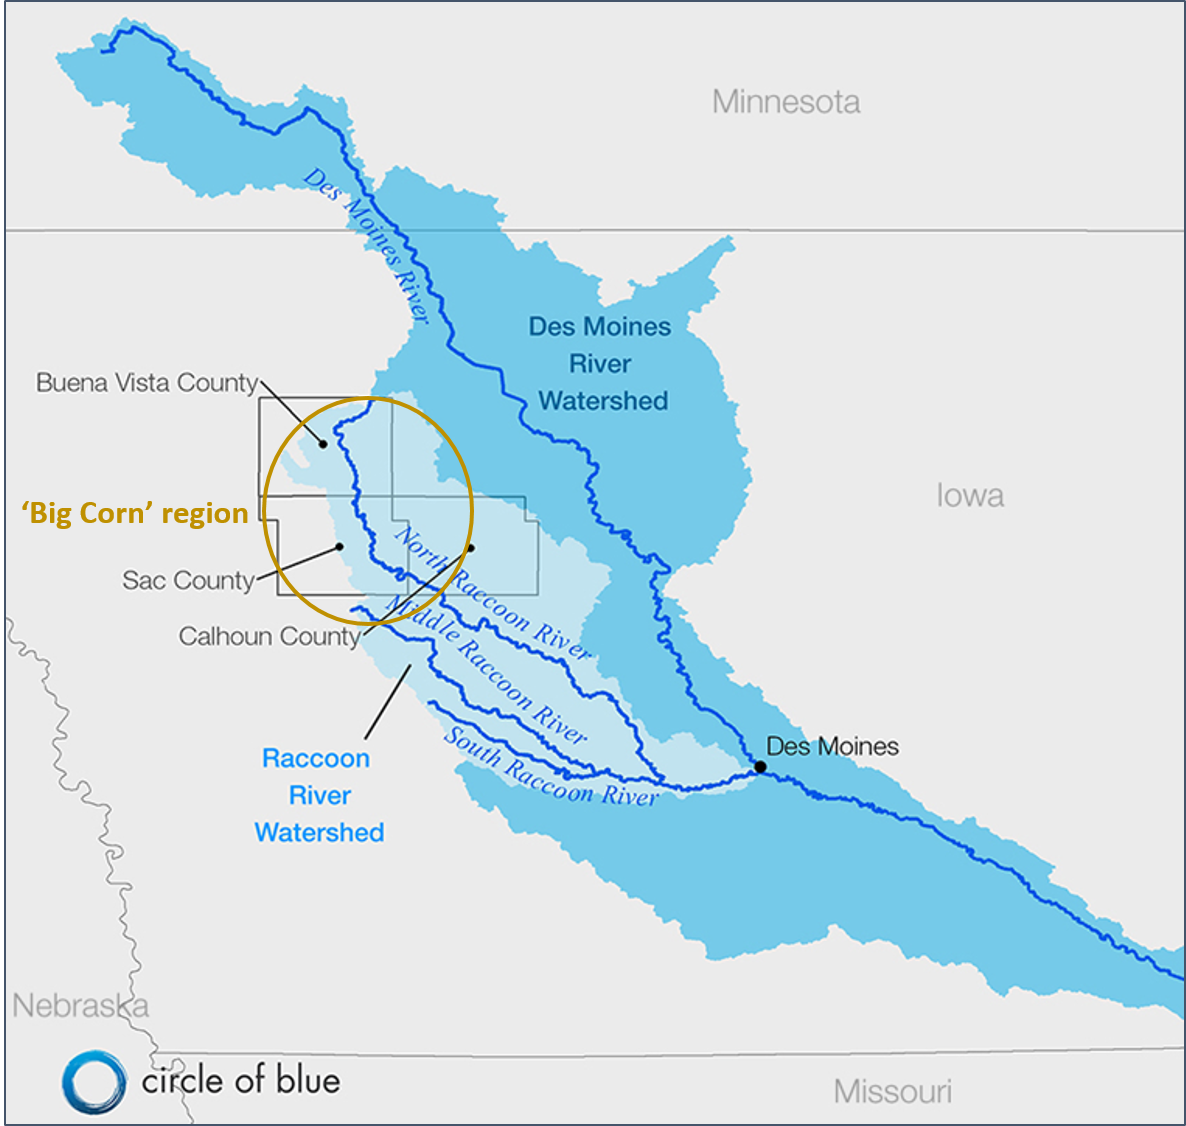


**Figure S1.** Highlighted in light blue is the Raccoon River watershed, including Buena Vista, Calhoun, and Sac County cornfields, which deliver nitrate-rich runoff from nearby farms to the city of Des Moines downstream (Photo: adopted from Walton, 2015).

All parties involved acknowledge that a water crisis is near, yet how is will be solved, and who will pay for that solution, is currently a hot debate topic.

1. Can the Raccoon River nitrates issue be solved easily?

A) YES, the Raccoon River nitrates issue can be solved easily.

B) NO, the Raccoon River nitrates issue cannot be solved easily.

*If A, then*: Explain why you think the Raccoon River nitrates issue should be easy to solve.

*If B, then*: Explain why you think the Raccoon River nitrates issue cannot be solved easily.

2. Iowa officials suggest that the best approach solving the Raccoon River nitrates issue and reducing nitrate loads in the waterways is through voluntary conservation measures.

2a. How do you think Farmers’ Drainage Cooperative of Big Corn would respond to this suggestion? Please explain your response.

2b. How do you think the residents of Des Moines would respond to this suggestion? Please explain your response.

3. If you were responsible for deciding how to resolve the Raccoon River nitrates issue, would you need additional information regarding the situation before making your decision?

A) YES, I would need to have additional information to make a decision.

B) NO, I have sufficient information to make a decision.

*If A, then*: What kinds of additional information would be necessary for you to make a decision regarding the Raccoon River nitrates issue?

*If B, then*: If you were responsible for deciding how to resolve the Raccoon River nitrates issue, what would you recommend doing? Please explain why this would be an effective strategy.

4. Scientists at the Des Moines Water Works stated that water sampled from 72 sites around the Big Corn region, which drain into the Raccoon River, showed nitrate levels as high as 39.2 mg/L - four times the federally required safe drinking water nitrate regulatory limit of 10mg/L (Neeley, 2017). If the Farmers' Drainage Cooperative of Big Corn were to hire scientists to make similar measurements, do you think they would find the same nitrate levels?

A) YES, I think they would find the same nitrate levels.

B) NO, I do not think they would find the same nitrate levels.

*If A, then:* Explain why you think the Farmer-appointed scientists would find the same nitrate levels.

*If B, then:* Explain why you think the Farmer-appointed scientists would find different nitrate levels.

5. In what ways (if any) could scientists contribute to the resolution of the Raccoon River nitrates issue? Be as specific as possible in terms of what scientists could do or what information they could contribute to the debate.

**Literature cited**

Who will pay for water pollution cleanup divides urban and rural Iowa. (2016, October 25).Retrieved from http://www.pbs.org/newshour/bb/will-pay-water-pollution-cleanup-divides-urban-rural-iowa/

Iowa partnership for clean water responds to Des Moines Water Works’ Decision to direct an additional $650,0000 to lawsuit. (2016, May 25). Retrieved from <http://iowapartnershipforcleanwater.org/2016/05/iowa-partnership-for-clean-water-responds-to-des-moines-water-works-decision-to-direct-an-additional-650000-to-lawsuit/>

Neeley, T. (2017, January 27). Damages not allowed in Iowa runoff case: Iowa high court rules against Des Moines Water Works. Retrieved from <https://www.dtnpf.com/agriculture/web/ag/news/article/2017/01/27/iowa-high-court-rules-des-moines>

Sands, G. R., Hay, C., Kandel, H., & Scherer, T. (2012). *Frequently asked questions about subsurface (tile) drainage in the red river valley* [PDF document]. Retrieved from the University of Minnesota Extension website: https://www.extension.umn.edu/agriculture/water/publications/pdfs/faqs_of_tile_drainageprint_61313.pdf

Walton, B. (2015, March 9). Des Moines Water Utility to File Nitrate Pollution Lawsuit. Retrieved from <http://www.circleofblue.org/2015/world/des-moines-water-utility-file-nitrate-pollution-lawsuit/>

Depth of SSR Exemplars with QuASSR Rubric

Criteria for each level of rubric scoring of participants’ responses regarding the five dimensions of SSR, as well as exemplars for each, serve as an indication of the depth of SSR exhibited by the participants and can be found in the tables below.

**Table S1.** Rubric and exemplars for the complexity dimension of SSR.

|  | **Sophistication Level** | | | | |
| --- | --- | --- | --- | --- | --- |
| **Complexity** | 0 | 1 | 2 | 3 | 4 |
| **Criteria** | Suggests that the issue is not complex or provides an illogical response. | Identifies at least one source of complexity. | Identifies at least one source of complexity and provides a contextual explanation or justification of a source | Identifies at least two sources of complexity and provides a contextual explanation or justification for one of those sources | Identifies two or more sources of complexity and provides contextual explanations or justifications for at least two of those sources. |
| **Fixed Choice Response:** Would this be a difficult issue to resolve? | No | Yes | Yes | Yes | Yes |
| **Exemplar Quote** | The issue can be "easy" to solve with one step: not allowing farmers to use nitrates. This would solve the nitrate issue quickly and easily. | It takes a lot of money to update systems and machines to clean the water. | There are several possible solutions to the Raccoon River nitrates issue. However, none of these solutions are "EASY" or they would have already been applied, without difficulty. | Since there are many farms that feed into the raccoon river it will be hard to identify the ones that are leading to the pollution of the river. Also it takes a lot of money to regulate and control runoff or farm ground as well as implementing water cleaning systems in the river for drinking water. Who is going to pay for these costs? Nobody wants to take charge of figuring out the issue. | Because cleaning up the water way would take a lot of work and most likely money on both sides of the issue. The farmers would need to upgrade their drainage system or find a way to stop using so much fertilizer on their farms which costs money and some time. The state would also have to put in some regulations stating what is a safe amount of fertilizer that can be allowed to runoff a farm and then they would have to enforce these regulations with every farmer in these counties which takes a lot of man power and time. It also would be hard to see how much fertilizer and nitrates are running off of each individual farm. If the farmers were not to do this and the water would be left the way it is, then the city would have to take extra measures and possibly upgrade their equipment in order to make the water safe for residential use. |

**Table S2.** Rubric and exemplars for the perspective-taking dimension of SSR.

|  | **Sophistication Level** | | | | |
| --- | --- | --- | --- | --- | --- |
| **Perspective Taking** | 0 | 1 | 2 | 3 | 4 |
| **Criteria** | Presents perspectives that are NOT consistent with stakeholder views Judgment answer with no detail (ie “they would not like it”) | Presents a perspective consistent with a stakeholder view. | Presents a perspective consistent with a stakeholder view and provides a contextual explanation, justification, or elaboration of the perspective. | Presents perspectives consistent with both stakeholder views and provides a contextual explanation, justification, or elaboration of one of those perspectives. | Presents perspectives consistent with both stakeholder views and provides a contextual explanation, justification, or elaboration of both perspectives. |
| **Fixed Response Choice:** How would Farmers and Des Moines Residents respond the proposed resolution solution? |  |  |  |  |  |
| **Exemplar Quote** | F: The farmers would reject this decision. They wouldn’t want to kill their profit.  DM: The residents of Des Moines will strongly agree this suggestion. If not, the nitrate contaminated water can risk their health. | F: I think the Farmers' Drainage Cooperative of Big Corn would respond better to this suggestion than if Iowa Officials had suggested fines.  DM: They may still be worried because not so many people may choose to voluntarily conserve. | F: They wouldn't mind this suggestion because it is not forcing them do to anything different, so they won. This is just a voluntary idea and they have no incentive to change their habits.  DM: They would be all for it because it would benefit their water quality. | F: The key word here is voluntary. This might actually be the best case scenario for Big Corn as it shows cooperation but little effort. Since the option is voluntary, they get to choose whether or not they want to participate in conservation measure  DM: I think residents would be very pleased to hear clean water efforts are being made. | F. They would like the idea because it is voluntary...They don't want to conserve the amount of fertilizers they use if it may have a detrimental effect on crop yield. Since there is no regulation in place, there really isn't a reason they would have to change anything if it impacted them negatively.  DM. They would not like this either as there is no legal ground to the conservation. There is no way to hold farmers accountable if they are not using the fertilizers responsibly, which means if the water is bad nobody takes the blame and the people of Des Moines have to live with the effects. |

*Note.* F = Farmers, DM = Des Moines Residents. .

**Table S3.** Rubric and exemplars for the inquiry dimension of SSR.

|  | **Sophistication Level** | | | | |
| --- | --- | --- | --- | --- | --- |
| **Inquiry** | 0 | 1 | 2 | 3 | 4 |
| **Criteria** | Suggests that NO further inquiry is required or YES but provides an illogical response. | Identifies an area of further inquiry. | Identifies at least one area of further inquiry and provides a contextual explanation, justification, or description of an area of inquiry | Identifies at least two areas of further inquiry and provides contextual explanation, justification, or description for one of those areas | Identifies two or more areas of inquiry and provides contextual explanation/justification/description for at least two. |
| **Fixed Choice Response:** Is additional information needed before making a decision about the issue? | No | Yes | Yes | Yes | Yes |
| **Exemplar Quote** | I have all the information I need | I would need to know where exactly these nitrate pollutants are coming from. | One of the most important studies that would be needed for this case would be an environmental audit on the land along the entirety of the river from the point of controversy to the Des Moines Public Water Supply. This could help determine a few things: if and where there are sources of contamination, who might be responsible, and what legal action to take. | It would be important to know the feelings around the ag community on this issue. They know the situation is nearing a water crisis but do not have the means to change their entire agriculture process. I would need to know what part of the transition they can handle and what they need help with. I would also need to know what can be done to bring the urban and rural community together on the solution of the issue. | I would need to know policy evaluations for all of the various options made available to me. These evaluations should give predictions about expected economic impact of new regulations and that information is going to be hugely beneficial because it could potentially eliminate any policy that would severely hamper the Iowa agricultural industry. Additionally, these policy evaluations should give a timeframe for success that I don't have available to me now. These evaluations would give information to clarify the impacts of policy alternatives and would lead myself or other legislators to find a better solution. Information gathering should always be the first step in resolving any difficult issue. This would include interviews from Iowa's farmers, as well as interviews with water treatment managers in Des Moines. Bringing the ideas from both these groups together is going to be critical to finding the best option to solve the nitrates issue. Additionally, extra scientific information would help to fully understand the issue and might give added insight into problem areas that weren't previously considered. Overall, additional information gathering must be done before options are considered or evaluated. Without proper understanding legislators would basically be making decisions with ignorance. |

**Table S4.** Rubric and exemplars for the skepticism dimension of SSR.

| **Skepticism** | **Sophistication Level** | | | | | | |
| --- | --- | --- | --- | --- | --- | --- | --- |
| 0 | 1 | | 2 | | 3 | 4 |
| **Criteria** | Suggests that the nitrate levels would be the same or provides an illogical response. | Identifies one way in which the levels would be different. | | Identifies one way in which the levels would be different (explicit or implied) and provides an explanation or justification for the difference. | Identifies two ways in which the levels would be different and provides an explanation or justification for one difference. | | Identifies two ways in which the levels would be different and provides an explanation or justification for both differences. |
| **Fixed Choice Response:** Would the different scientists’ findings be similar? | Yes | No | | No | | No | No |
| **Exemplar Quote** | If the Big Corn region drains directly into the Raccoon River, then the same nitrate levels would be found. | The scientists would find different nitrate levels because they represent different sides. | I guess the Farmer-appointed scientists would be biased towards the farmers. As those scientist are being paid by the farmers, they would make decisions which favors the farmers like reduced the level of nitrate in their water. | | | I think farmer-appointed scientists maybe bring biased results. Since farmers don't want to pay much money in maintaining water quality, they will make sure the scientists show Government the results they want. It is possible that scientists hired by the farmers would use different variables and different instruments to read the nitrate levels. | With a constantly shifting water system it is possible that scientists could find different nitrate levels based on a variety of factors in the same sampling areas. The depth of the water, time of day, temperature of the water, biological activity, etc. could all impact the nitrate levels in the river. I believe that even a non-biased group of scientists could find slightly different results. If you also take into account that these scientists would be funded through Iowa farmers, then the likelihood of skewed results goes up. These scientists could deliberately conduct slightly different measurements and therefore find slightly different results that support their funders. |

**Table S5.** Rubric and exemplars for the affordances of science dimension of SSR.

|  | **Sophistication Level** | | | | |
| --- | --- | --- | --- | --- | --- |
| **Affordances of Science** | 0 | 1 | 2 | 3 | 4 |
| **Criteria** | Suggests that science would not be helpful or provides an illogical response | Identifies one way in which science would be helpful for issue resolution. | Identifies one way in which science would be helpful and provides an explanation or justification. | Identifies two ways in which science would be helpful and provides an explanation or justification for one. | Identifies two ways in which science would be helpful and provides an explanation or justification for both. |
| **Fixed Response Choice:** Can science help find a solution to the issue? | No | Yes | Yes | Yes | Yes |
| **Exemplar Quote** | No – Science is not helpful | Scientists could show what damages the nitrates cause, to both people and the ecosystem. | Scientists could do some research to see how farmers can minimize nitrates from going into the river. This would be both beneficial to all the people. They can see what processes are effective for example buffer strips, cover crops, and bio filters. | Scientists can provide monitoring and measurements of water quality, as well as devise methods of decreasing nitrate fertilizer use that will still have a large benefit for the growth of plants; scientists can also develop newer, cheaper filtration methods and testing methods to assure water quality for residents, as well as developing newer, cheaper methods of drainage for farmers. | Scientists have the capability of changing the world in many ways. In this specific scenario, it would be best to entirely outline the dangers of nitrates in drinking water, soil, etc. By providing information on how nitrates can impact a wide spectrum of life, from microscopic organisms to humans, then a proper debate on the use of fertilizers can begin. At the same time, the party interested in the mass production of corn wants to continue to operate at those levels. Scientists can also have a huge influence on this industry. There are many researchers currently developing alternative fertilizers that are natural and safe for all life. In short, scientists can prove the dangers of nitrates while providing safe alternatives. |
